# Supplementary material for: A lateral built-in field of the 2D/2D SnS2/SnSe2 in-plane heterostructure with boosted interfacial charge transfer
Source: Royal Society of Chemistry journal article supplement (doi:10.1039/d2ta03333j), 2022-01-01
Supplement: d2ta03333j1.pdf [file d2ta03333j1.pdf]

## Supplementary Information

### **Lateral built-in field of 2D/2D SnS<sub>2</sub>/SnSe<sub>2</sub> in-plane heterostructure with boosted interfacial charge transfer**

*Ruozhen Wu<sup>a</sup>, Tiezhu Xin<sup>a</sup>, You Wang<sup>a\*</sup>, Tingting Wang<sup>a</sup>, Lizhao Liu<sup>b\*</sup> and Juanyuan Hao<sup>a\*</sup>*

<sup>a</sup>School of Materials Science and Engineering, Harbin Institute of Technology, Harbin 150001, P. R. China.

<sup>b</sup>Key Laboratory of Materials Modification by Laser, Ion and Electron Beams (Ministry of Education), School of Physics, Dalian University of Technology, Dalian 116024, PR China

\*Corresponding authors.

E-mail addresses: jyhao@hit.edu.cn (J. Hao), lizhao\_liu@dlut.edu.cn (L. Liu), y-wang@hit.edu.cn (Y. Wang)

### DFT calculation results:

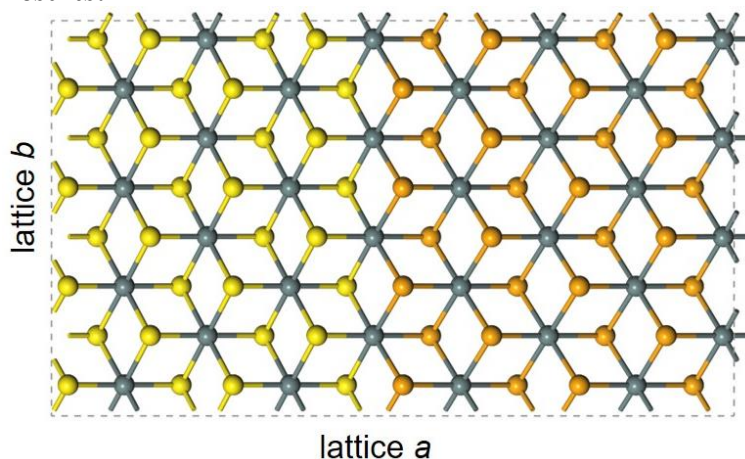

**Fig. S1.** The slab model of  $\text{Sn}_{32}\text{S}_{32}\text{Se}_{32}$  supercell for  $\text{SnS}_2/\text{SnSe}_2$  lateral heterojunction, where the lateral heterojunction is  $a=26.17 \text{ \AA} / b=15.13 \text{ \AA}$ . The orange, yellow, and grey balls are Se, S, and Sn atoms, respectively.

**Table S1.** Bandgap values derived from the density of states (DOS) in different domains of  $\text{SnS}_2/\text{SnSe}_2$  lateral heterojunction.

| Domains           | $\text{SnS}_2$ | Heterointerface | $\text{SnSe}_2$ |
|-------------------|----------------|-----------------|-----------------|
| Bandgap ( $E_g$ ) | 0.83           | <b>0.41</b>     | 0.44            |

**Analyzed results of DFT calculations.** The adsorption energies ( $E_{ads}$ ) for  $\text{NO}_2$  molecule on the surface of  $\text{SnS}_2/\text{SnSe}_2$  lateral slab shows that the  $E_{ads}$  value of interface domain is more negative than that of  $\text{SnS}_2$  and  $\text{SnSe}_2$  domains (**Fig. 1a**), which the negative value represents the exothermic process, indicating the interfaces could serve as the active sites for  $\text{NO}_2$  adsorption. Moreover, the charge density difference of the lateral heterojunctions shows the efficient diffusion of charge carriers across interface (**Fig. 1b**), which originates from the transport bridge of chemical bond S-Sn-Se and is conducive to improving the charge separation and transfer kinetics. The reduced bandgap of the interface domain (**Fig. 1c** and **Table S1**) indicates the improved electrical conductivity in  $\text{SnS}_2/\text{SnSe}_2$  lateral heterostructure which could serve as a channel to boost charge transfer along the 2D basal plane to react with electrophilic  $\text{NO}_2$  molecules, contributing to enhancing the gas sensing performance. The DOS of interface in the valence band near the Fermi level shows that the holes in the valence band are mainly contributed by Se (**Fig. 1c**), implying that the electrons of  $\text{SnSe}_2$  near the interface tend to diffuse into  $\text{SnS}_2$  while leaving holes in  $\text{SnSe}_2$ .

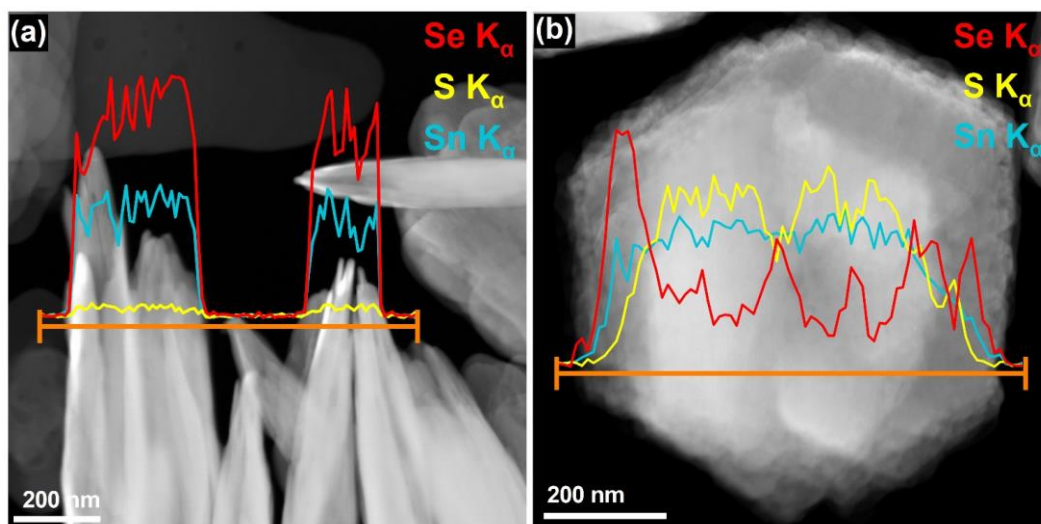

**Fig. S2.** HAADF-STEM image of SnS<sub>2</sub>/SnSe<sub>2</sub>-2 nanosheets, with composition determined from the EDX profile along orange line of Se K $\alpha$  (red line), S K $\alpha$  (yellow line) and Sn K $\alpha$  (cyan line) signals: (a) side view, (b) top view. The results show that the spatial distribution of Se and S elements have the highest and lowest concentration at the edges, respectively, indicating that the *in-situ* grown SnSe<sub>2</sub> interfaces with the SnS<sub>2</sub> to form a lateral rather than vertical 2D/2D heterostructure at low concentration of Se precursor.

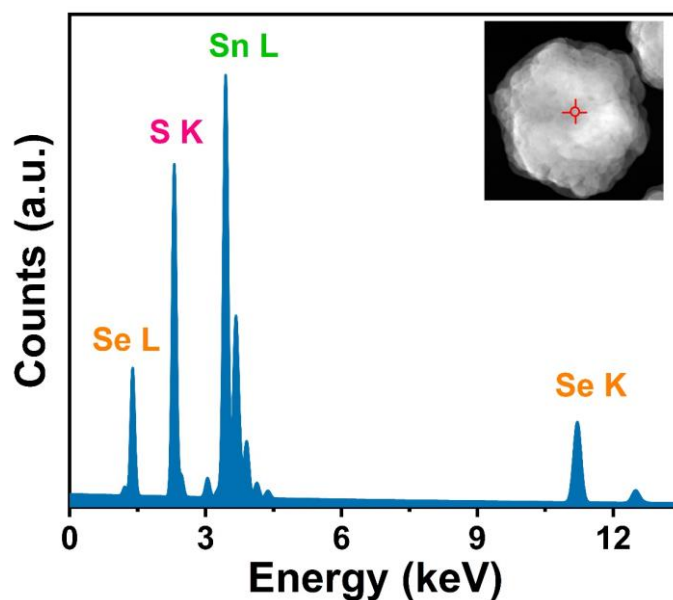

**Fig. S3.** EDX spot analysis in the core region of SnS<sub>2</sub>/SnSe<sub>2</sub>-3 nanosheet. The result shows the coexistence of Se and S elements in the core region of SnS<sub>2</sub>/SnSe<sub>2</sub>-3, further confirming the formation of the core-shell heterostructure for SnS<sub>2</sub>/SnSe<sub>2</sub>-3.

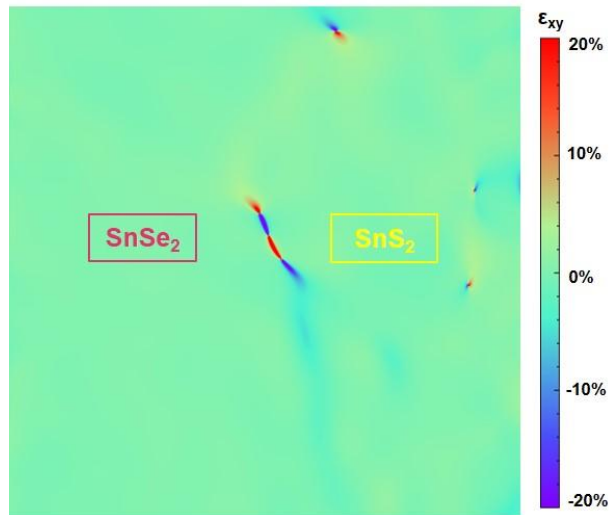

**Fig. S4.** geometric phase analysis (GPA) map deriving from the HRTEM image of SnS<sub>2</sub>/SnSe<sub>2</sub>-2 heterostructure. The result indicates the low density of stacking faults between the parent SnS<sub>2</sub> and derived SnSe<sub>2</sub>, confirming the formation of sharp lattice-matched heterointerface.

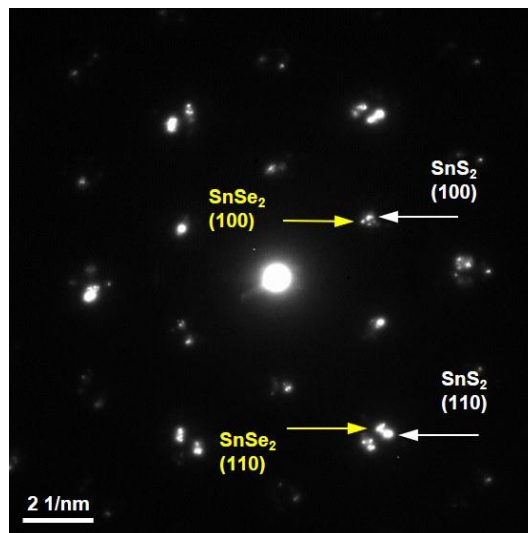

**Fig. S5.** SAED pattern of SnS<sub>2</sub>/SnSe<sub>2</sub>-2 heterostructure. The result shows an approximate hexagon in distribution with two identifiable groups of diffraction spots in the same orientation, corresponding to the SnSe<sub>2</sub> and SnS<sub>2</sub>, respectively.

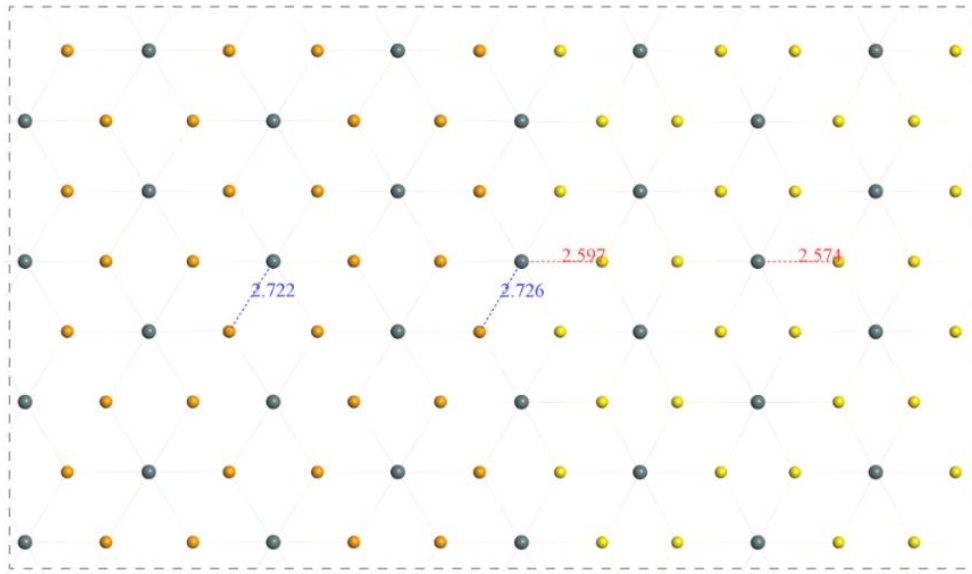

**Fig. S6.** Atomic arrangement and bond lengths of Se-Sn and S-Sn bonds in SnSe<sub>2</sub> region, interface, and SnS<sub>2</sub> region of 2D SnS<sub>2</sub>/SnSe<sub>2</sub> lateral heterostructure. The orange, yellow, and grey balls represent the Se, S, and Sn atoms, respectively.

**Table S2.** The bond lengths and bond orders around the interface of SnS<sub>2</sub>/SnSe<sub>2</sub> lateral heterostructure. The number after the element is the serial number of the element in the SnS<sub>2</sub>/SnSe<sub>2</sub> lateral heterostructure.

|               | Bond Length (Å) | Bond Order |
|---------------|-----------------|------------|
| S7-Sn22       | 2.574           | 0.39       |
| S18-Sn24-Se29 | 2.597, 2.726    | 0.35, 0.03 |
| Se12-Sn6      | 2.722           | 0.20       |

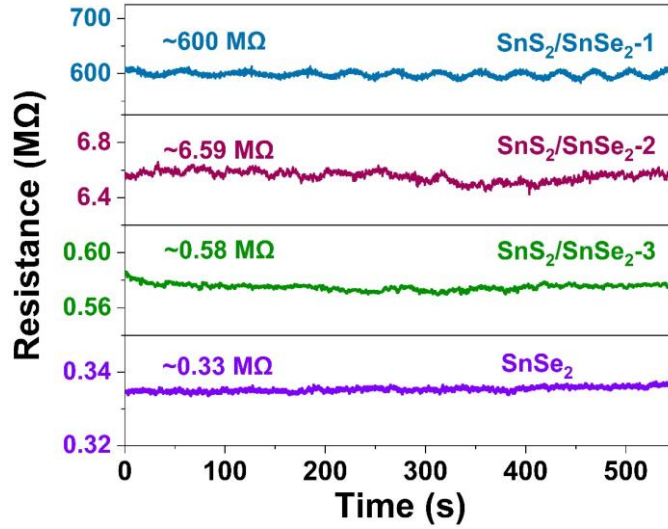

**Fig. S7.** Baseline resistance of SnS<sub>2</sub> template, SnS<sub>2</sub>/SnSe<sub>2</sub>-1, SnS<sub>2</sub>/SnSe<sub>2</sub>-2, SnS<sub>2</sub>/SnSe<sub>2</sub>-3, and SnSe<sub>2</sub>. The baseline resistance sharply declines after the formation of SnS<sub>2</sub>/SnSe<sub>2</sub> heterostructure, from ~600 MΩ of SnS<sub>2</sub>/SnSe<sub>2</sub>-1 to ~0.58 MΩ of SnS<sub>2</sub>/SnSe<sub>2</sub>-3 that is close to ~0.33 MΩ of SnSe<sub>2</sub>, indicating that the formation of 2D/2D seamless stitching SnS<sub>2</sub>/SnSe<sub>2</sub> heterostructure significantly modulates the electronic structure and improves the conductivity of SnS<sub>2</sub>. This is due to that the electrons of SnSe<sub>2</sub> diffuse into the SnS<sub>2</sub> to increase the electron density of SnS<sub>2</sub>, contributing to the lower resistance of heterostructure than that of pristine SnS<sub>2</sub>.

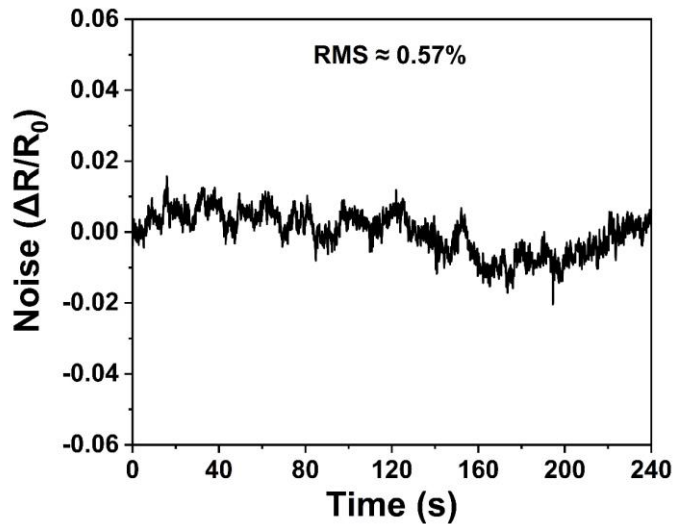

**Fig. S8.** Experimentally recorded noise of response for the SnS<sub>2</sub>/SnSe<sub>2</sub>-2 sensor. The result indicates that the root-mean-square (RMS) value of background noise is about 0.57%.

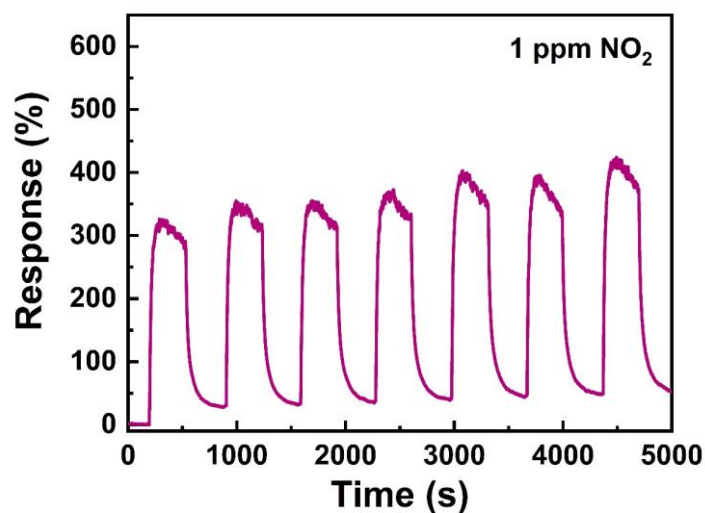

**Fig. S9.** Repeatability test of SnS<sub>2</sub>/SnSe<sub>2</sub>-2 conducted by seven successive cycles upon the exposure of 1 ppm NO<sub>2</sub> at room temperature. The result shows the good reversible response and recovery with the nearly same response value.

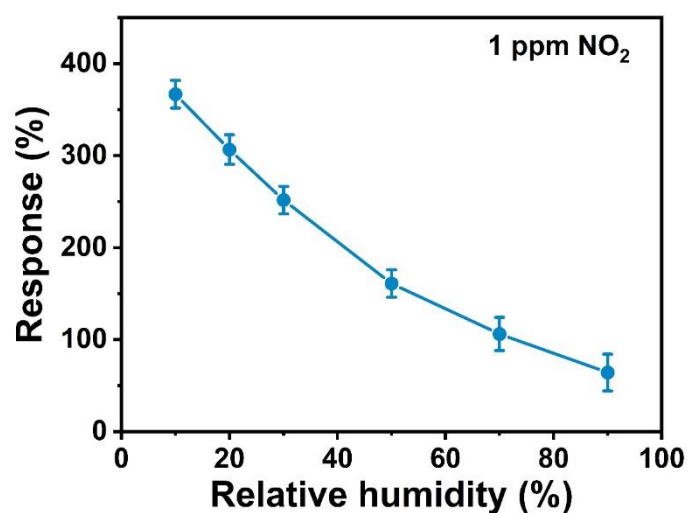

**Fig. S10.** Evolution of response with the relative humidity increasing from 10% to 90% for SnS<sub>2</sub>/SnSe<sub>2</sub>-2. The result shows that the response of SnS<sub>2</sub>/SnSe<sub>2</sub>-2 decreases with the relative humidity changing from 10% to 90%, which may be ascribe to the strong competitive adsorption between H<sub>2</sub>O and NO<sub>2</sub> molecules.

**Table S3.** The sensing properties of SnS<sub>2</sub>/SnSe<sub>2</sub>-2 sensor compared with the state-of-the-art resistive-type SnS<sub>2</sub>-based NO<sub>2</sub> sensors in literature.

t<sub>res</sub> = Response time, t<sub>rec</sub> = Recovery time, RT\* = Light illumination at room temperature.

| Sensing materials                         | Condition (°C) | NO <sub>2</sub> (ppm) | Response (%)  | t <sub>res</sub> /t <sub>rec</sub> (s/s) | Sensitivity (% ppm <sup>-1</sup> ) | Detection Limit (ppb) | Reference        |
|-------------------------------------------|----------------|-----------------------|---------------|------------------------------------------|------------------------------------|-----------------------|------------------|
| SnS <sub>2</sub> flakes                   | 150            | 10                    | 2000          | - / -                                    | ~570                               | 300                   | [1]              |
| 2D SnS <sub>2</sub> /rGO                  | 150            | 5                     | 3200          | 50 / 48                                  | /                                  | 500                   | [2]              |
| Mo-doped SnS <sub>2</sub>                 | 150            | 100                   | 4751          | 33.5 / 21                                | /                                  | /                     | [3]              |
| 3D SnS <sub>2</sub> /rGO                  | RT             | 8                     | 49.8          | 153 / 76                                 | 6.1                                | 8.7                   | [4]              |
| SnS <sub>2</sub> /MoS <sub>2</sub>        | RT             | 5                     | 270           | 2.9 / 24.5                               | /                                  | 50                    | [5]              |
| SnS <sub>2</sub> /SnS                     | RT             | 4                     | 660           | 365 / 1216                               | ~200                               | 75                    | [6]              |
| S-rich SnS <sub>2</sub>                   | RT             | 10                    | 701           | 272 / 3800                               | 0.5                                | 1000                  | [7]              |
| SnS <sub>2</sub> flowers                  | RT*            | 5                     | 1428          | 400 / 1100                               | 251                                | 400                   | [8]              |
| SnSe <sub>2</sub> /SnSe                   | RT*            | 1                     | ~600          | - / >300                                 | 6.1                                | 100                   | [9]              |
| <b>SnS<sub>2</sub>/SnSe<sub>2</sub>-2</b> | <b>RT</b>      | <b>4</b>              | <b>1165.2</b> | <b>80 / 78</b>                           | <b>322.0</b>                       | <b>50</b>             | <b>This work</b> |

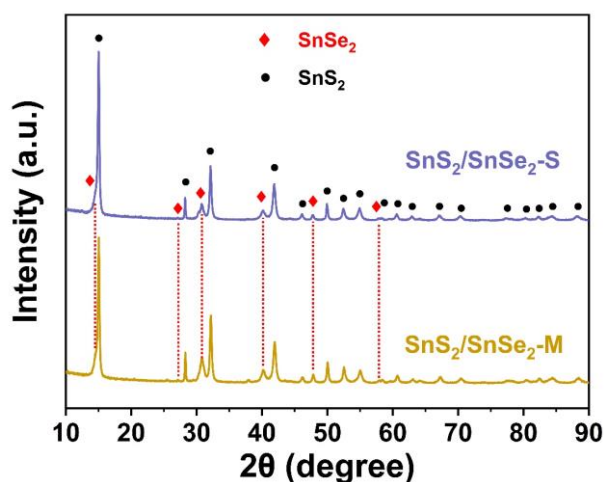

**Fig. S11.** XRD patterns of SnS<sub>2</sub>/SnSe<sub>2</sub>-M and SnS<sub>2</sub>/SnSe<sub>2</sub>-S heterostructures. The SnS<sub>2</sub>/SnSe<sub>2</sub>-M and SnS<sub>2</sub>/SnSe<sub>2</sub>-S heterostructures were synthesized by physical mixing and solvothermal deposition approaches, respectively. The XRD results show the coexistence of SnS<sub>2</sub> and SnSe<sub>2</sub> crystals without any other impurities, indicating the formation of SnS<sub>2</sub>/SnSe<sub>2</sub>-M and SnS<sub>2</sub>/SnSe<sub>2</sub>-S heterostructures.



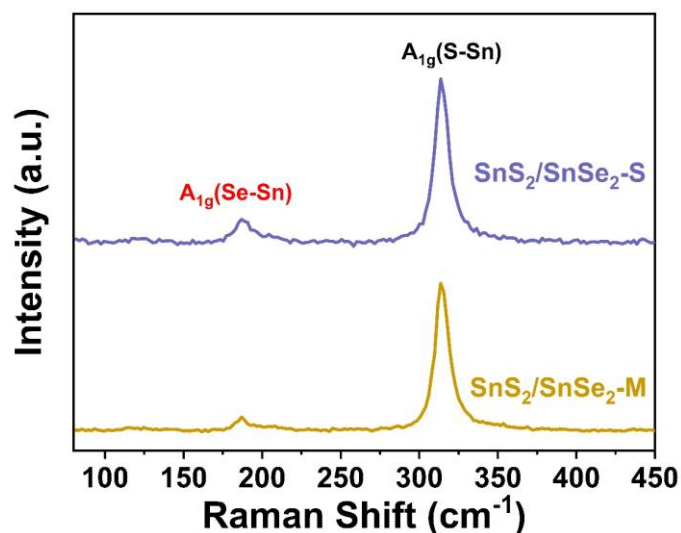

**Fig. S12.** Raman spectra of SnS<sub>2</sub>/SnSe<sub>2</sub>-M and SnS<sub>2</sub>/SnSe<sub>2</sub>-S heterostructures. The results show the vibration modes of layered SnS<sub>2</sub> and SnSe<sub>2</sub> crystals, which is consistent with the XRD result, verifying that the formation of SnS<sub>2</sub>/SnSe<sub>2</sub>-M and SnS<sub>2</sub>/SnSe<sub>2</sub>-S heterostructures.

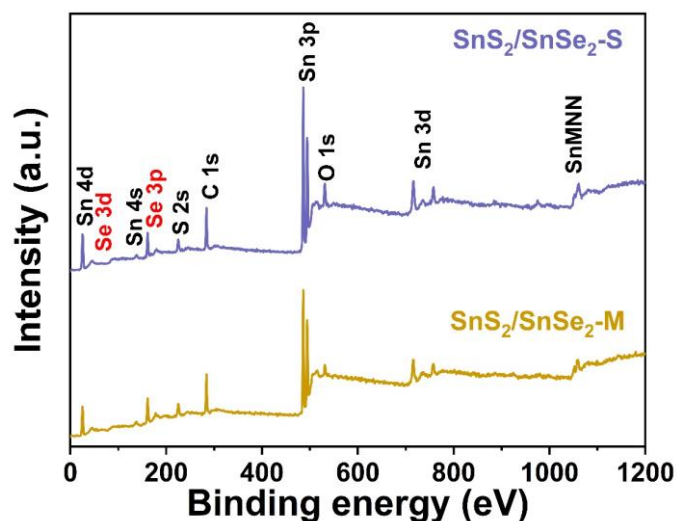

**Fig. S13.** XPS elemental survey spectra of SnS<sub>2</sub>/SnSe<sub>2</sub>-M and SnS<sub>2</sub>/SnSe<sub>2</sub>-S heterostructures. The results show the coexistence of S and Se elements without impurities in the SnS<sub>2</sub>/SnSe<sub>2</sub>-M and SnS<sub>2</sub>/SnSe<sub>2</sub>-S heterostructures, confirming that the formation of SnS<sub>2</sub>/SnSe<sub>2</sub>-M and SnS<sub>2</sub>/SnSe<sub>2</sub>-S heterostructures.

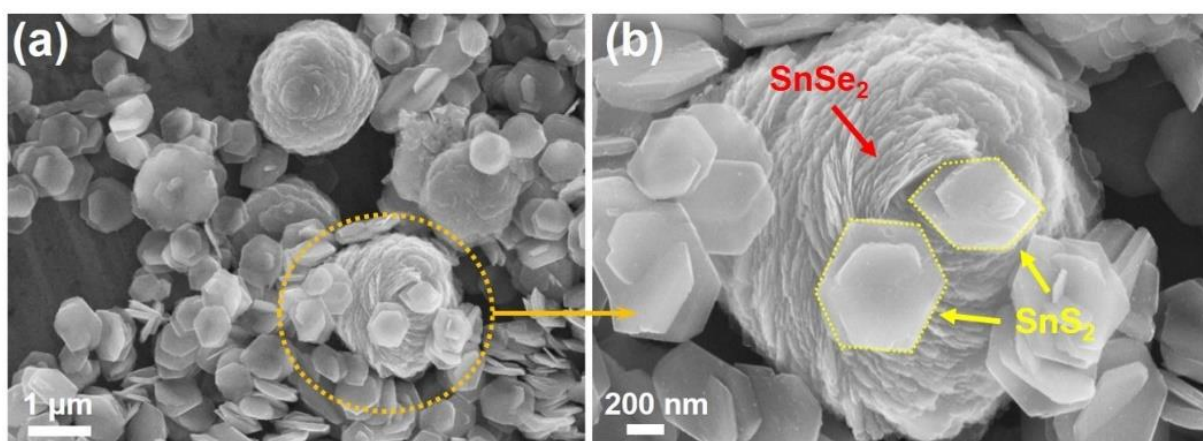

**Fig. S14.** SEM images of SnS<sub>2</sub>/SnSe<sub>2</sub>-M heterostructure. The SEM images of SnS<sub>2</sub>/SnSe<sub>2</sub>-M display that the hexagonal SnS<sub>2</sub> crystals (marked by yellow) randomly and loosely stack on the SnSe<sub>2</sub> crystals (marked by red), indicating a poor-quality heterointerface of SnS<sub>2</sub>/SnSe<sub>2</sub>-M.

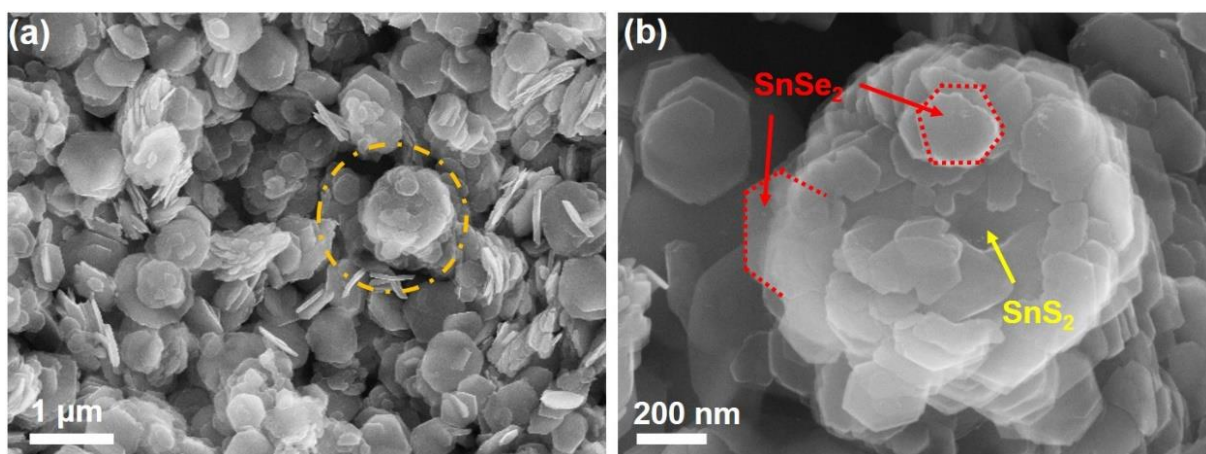

**Fig. S15.** SEM images of SnS<sub>2</sub>/SnSe<sub>2</sub>-S heterostructure. The SEM images of SnS<sub>2</sub>/SnSe<sub>2</sub>-S show that the SnSe<sub>2</sub> crystals (marked by red) grow on the surface of SnS<sub>2</sub> nanosheets (marked by yellow) with a relatively intimate contact compared to the SnS<sub>2</sub>/SnSe<sub>2</sub>-M.

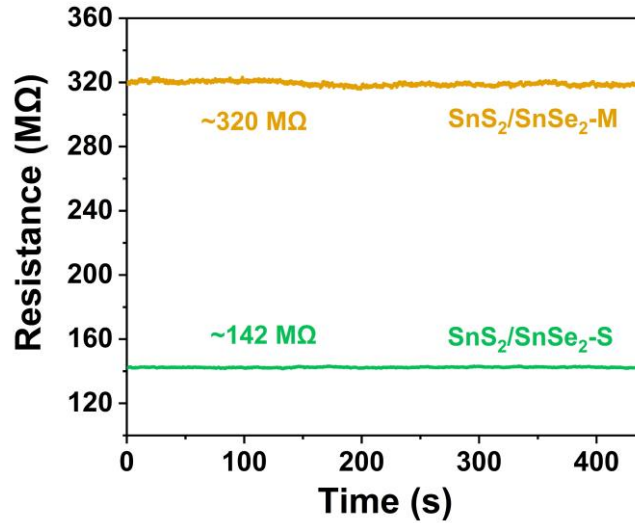

**Fig. S16.** The initial resistance of the sensors based on the SnS<sub>2</sub>/SnSe<sub>2</sub>-M and SnS<sub>2</sub>/SnSe<sub>2</sub>-S heterostructures. The smaller resistance of SnS<sub>2</sub>/SnSe<sub>2</sub>-S sensor may be due to the better contact and uniform dispersion between SnS<sub>2</sub> and SnSe<sub>2</sub>, as compared with the SnS<sub>2</sub>/SnSe<sub>2</sub>-M.

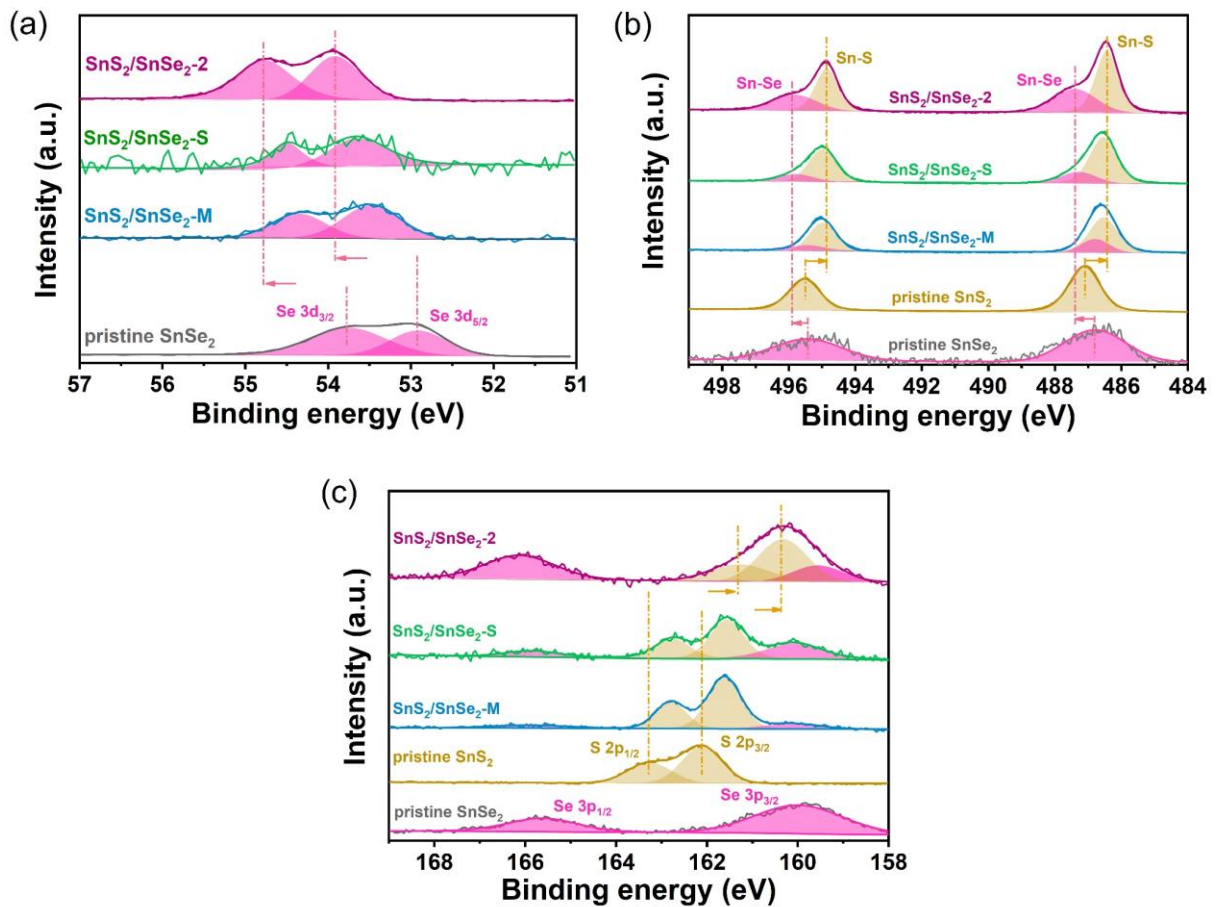

**Fig. S17.** High-resolution (a) Se 3d, (b) Sn 3d, and (c) S 2p & Se 3p XPS spectra for the pristine SnSe<sub>2</sub>, pristine SnS<sub>2</sub>, SnS<sub>2</sub>/SnSe<sub>2</sub>-M, SnS<sub>2</sub>/SnSe<sub>2</sub>-S, and SnS<sub>2</sub>/SnSe<sub>2</sub>-2.

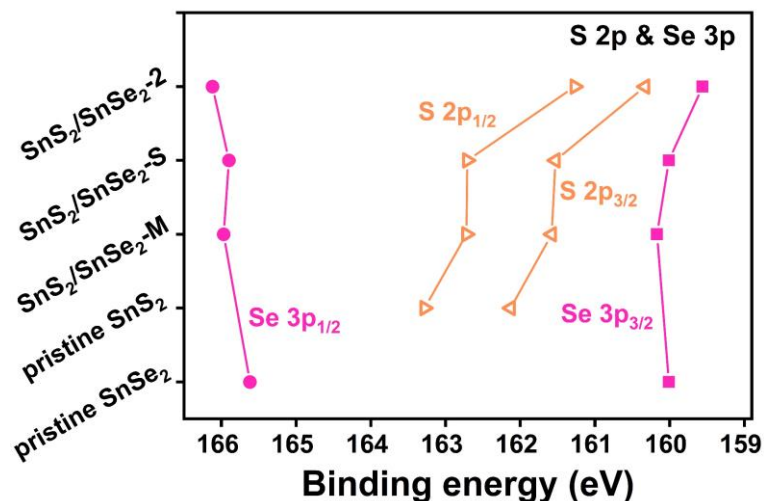

**Fig. S18.** The summarized S 2p and Se 3p peak positions for the pristine SnSe<sub>2</sub>, pristine SnS<sub>2</sub>, SnS<sub>2</sub>/SnSe<sub>2</sub>-M, SnS<sub>2</sub>/SnSe<sub>2</sub>-S, and SnS<sub>2</sub>/SnSe<sub>2</sub>-2 samples.

## References:

- [1] C. Kim, J. C. Park, S. Y. Choi, Y. Kim, S. Y. Seo, T. E. Park, S. H. Kwon, B. Cho, J. H. Ahn, *Small* **2018**, 14, 1704116.
- [2] M. Cheng, Z. Wu, G. Liu, L. Zhao, Y. Gao, B. Zhang, F. Liu, X. Yan, X. Liang, P. Sun, G. Lu. *Sens. Actuator, B* **2019**, 291, 216.
- [3] J. Zhou, K. Xue, Y. Liu, T. Liang, P. Zhang, X. Zhang, W. Zhang, Z. Dai, *Chem. Eng. J.* **2021**, 420, 127572.
- [4] J. Wu, Z. Wu, H. Ding, Y. Wei, W. Huang, X. Yang, Z. Li, L. Qiu, X. Wang, *Sens. Actuator, B* **2020**, 305, 127445.
- [5] L. Liu, M. Ikram, L. Ma, X. Zhang, H. Lv, M. Ullah, M. Khan, H. Yu, K. Shi, *J. Hazard. Mater.* **2020**, 393, 122325.
- [6] Q. Sun, J. Wang, J. Hao, S. Zheng, P. Wan, T. Wang, H. Fang, Y. Wang, *Nanoscale* **2019**, 11, 13741.
- [7] K. C. Kwon, J. M. Suh, T. H. Lee, K. S. Choi, K. Hong, Y. G. Song, Y. S. Shim, M. Shokouhimehr, C. Y. Kang, S. Y. Kim, H. W. Jang, *ACS Sens.* **2019**, 4, 678.
- [8] T. H. Eom, S. H. Cho, J. M. Suh, T. Kim, T. H. Lee, S. E. Jun, J. W. Yang, J. Lee, S.-H. Hong, H. W. Jang, *J. Mater. Chem. A* **2021**, 9, 11168.
- [9] X. Wang, Y. Liu, J. Dai, Q. Chen, X. Huang, W. Huang, *Chem. Eur. J.* **2020**, 26, 3870.
